# Supplementary material for: Ocean acidification enhances primary productivity and nocturnal carbonate dissolution in intertidal rock pools
Source: Copernicus journal article supplement (doi:10.5194/bg-20-4289-2023), 2023-10-20
Supplement: Supplementary file 1 [file bg-20-4289-2023-supplement.zip]

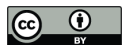

## *Supplement of*

# **Ocean acidification enhances primary productivity and nocturnal carbonate dissolution in intertidal rock pools**

**Narimane Dorey et al.**

*Correspondence to:* Narimane Dorey (narimane.dorey@gmail.com)

- bg-20-4289-2023-supplement-title-page.pdf
- SUPPMAT
  - Linear Regression result tables LM1\_3
    - \* 2\_LM\_CALCIF.csv
    - \* 2\_LM\_DICrespi.csv
    - \* 2\_LM\_O2respi.csv
  - Pools2020\_MainSupp\_FigS\_RevisedDoc.docx
  - Pools2020\_Supp\_FigLM.docx
  - Pools2020\_Supp\_FigNutrients.docx
  - Pools2020\_Supp\_FigSP\_RevisedDoc.docx
  - Raw data
    - \* 1\_DoreyPools2020\_RawDATA.csv

The copyright of individual parts of the supplement might differ from the article licence.
